# Supplementary material for: Evolutionary Relationships of Ljungan Virus Variants Circulating in Multi-Host Systems across Europe
Source: MDPI journal article supplement (doi:10.3390/v13071317), 2021-07-07
Supplement: s1 [file s1]

**Supplementary Table S1.** Site of origin for samples were analysed for LV VP1 and 3D<sup>pol</sup> regions. See also Figure 1. For each site the nearest location, country of origin, host species, trapping year and geographical coordinates are shown.

| Sampling site | Nearest location (acronym) | Country         | Host species (n°individuals)                                                                                                                                                                               | Trapping year | Latitude/Longitude     |
|---------------|----------------------------|-----------------|------------------------------------------------------------------------------------------------------------------------------------------------------------------------------------------------------------|---------------|------------------------|
| 1             | Kilpisjärvi (KJ)           | Finland         | <i>Lemmus lemmus</i> (3)                                                                                                                                                                                   | 2010-2011     | 69°02'34"N, 20°48'19"E |
| 2             | Pallasjärvi (PJ)           | Finland         | <i>Myodes glareolus</i> (5), <i>Microtus agrestis</i> (4), <i>Lemmus lemmus</i> (2), <i>Microtus oeconomus</i> (1), <i>Myodes rufocanus</i> (1), <i>Myodes rutilus</i> (2), <i>Myopus schistocolor</i> (3) | 2011          | 68°01'46"N, 24°12'16"E |
| 3             | Harads (HA)                | Sweden          | <i>Myodes glareolus</i> (1)                                                                                                                                                                                | 2010          | 65°40'54"N, 21°30'16"E |
| 4             | Haparanda (HP)             | Sweden          | <i>Myodes glareolus</i> (1)                                                                                                                                                                                | 2011          | 65°48'47"N, 24°07'11"E |
| 5             | Fredrika (FE)              | Sweden          | <i>Myodes glareolus</i> (1)                                                                                                                                                                                | 2010          | 63°56'25"N, 17°25'56"E |
| 6             | Umeå (UM)                  | Sweden          | <i>Myodes glareolus</i> (10)                                                                                                                                                                               | 2009-2012     | 63°53'22"N, 20°43'06"E |
| 7             | Gnarp (GN)                 | Sweden          | <i>Myodes glareolus</i> (2)                                                                                                                                                                                | 2012          | 61°51'13"N, 17°12'08"E |
| 8             | Enånger (EN)               | Sweden          | <i>Myodes glareolus</i> (3)                                                                                                                                                                                | 2012          | 61°31'36"N, 17°01'11"E |
| 9             | Tierp (TI)                 | Sweden          | <i>Myodes glareolus</i> (2)                                                                                                                                                                                | 2011          | 60°34'03"N, 17°48'40"E |
| 10            | Öster Malma                | Sweden          | <i>Myodes glareolus</i> (1)                                                                                                                                                                                | 2012          | 58°59'03"N, 17°05'07"E |
| 11            | Keava                      | Estonia         | <i>Mus musculus</i> (1)                                                                                                                                                                                    | 2012          | 58°56'27"N, 24°54'26"E |
| 12            | Nutter                     | The Netherlands | <i>Myodes glareolus</i> (1)                                                                                                                                                                                | 2012          | 52°24'46"N, 06°52'05"E |
| 13            | Jeeser                     | Germany         | <i>Myodes glareolus</i> (1)                                                                                                                                                                                | 2010          | 54°09'25"N, 13°15'14"E |
| 14            | Billerbeck                 | Germany         | <i>Myodes glareolus</i> (1)                                                                                                                                                                                | 2010          | 51°59'36"N, 07°19'01"E |
| 15            | Gotha                      | Germany         | <i>Myodes glareolus</i> (2)                                                                                                                                                                                | 2010          | 50°57'17"N, 10°39'03"E |
| 16            | Weissach (WE)              | Germany         | <i>Myodes glareolus</i> (8)                                                                                                                                                                                | 2010          | 48°50'39"N, 08°57'25"E |
| 17            | Rozhanovce                 | Slovakia        | <i>Myodes glareolus</i> (2)                                                                                                                                                                                | 2012          | 48°45'07"N, 21°20'37"E |
| 18            | Fugelka (FU)               | Slovakia        | <i>Myodes glareolus</i> (1)                                                                                                                                                                                | 2012          | 48°11'24"N, 07°04'57"E |
| 19            | La Venotiere (LA)          | France          | <i>Myodes glareolus</i> (2)                                                                                                                                                                                | 2014          | 47°44'25"N, 01°46'26"E |
| 20            | Vouzon                     | France          | <i>Myodes glareolus</i> (3)                                                                                                                                                                                | 2014          | 47°39'34"N, 02°07'21"E |
| 21            | Mont-Sondrious-Vaudrey     | France          | <i>Myodes glareolus</i> (2)                                                                                                                                                                                | 2014          | 46°56'06"N, 05°33'45"E |
| 22            | Mignovillard (MI)          | France          | <i>Myodes glareolus</i> (3)                                                                                                                                                                                | 2014          | 46°46'32"N, 06°09'06"E |
| 23            | Cormaranche-en-Bugey       | France          | <i>Myodes glareolus</i> (1)                                                                                                                                                                                | 2014          | 45°56'00"N, 05°37'10"E |
| 24            | Brescia (BS)               | Italy           | <i>Myodes glareolus</i> (2), <i>Mus musculus</i> (1), <i>Sorex antinorii</i> (1)                                                                                                                           | 2010 and 2012 | 46°13'16"N, 10°24'16"E |
| 25            | Pavia (PV)                 | Italy           | <i>Sciurus vulgaris</i> (1)                                                                                                                                                                                | 2011          | 44°52'10"N, 09°08'05"E |
| 26            | Sondrio (SO)               | Italy           | <i>Myodes glareolus</i> (4), <i>Sorex antinorii</i> (1)                                                                                                                                                    | 2008 and 2012 | 46°15'48"N, 10°16'39"E |

|           |             |         |                                                                                             |           |                        |
|-----------|-------------|---------|---------------------------------------------------------------------------------------------|-----------|------------------------|
| <b>27</b> | Trento (TN) | Italy   | <i>Myodes glareolus</i> (6), <i>Apodemus flavicollis</i> (1), <i>Microtus multiplex</i> (1) | 2011-2012 | 45°58'39"N, 10°53'48"E |
| <b>28</b> | Lecco (LC)  | Italy   | <i>Sciurus vulgaris</i> (1)                                                                 | 2002      | 45°43'19"N, 09°26'36"E |
| <b>29</b> | Pula        | Croatia | <i>Mus musculus</i> (1)                                                                     | 2012      | 44°50'45"N, 13°53'12"E |

**Supplementary Table S2.** List of primers used to amplify LV 3D<sup>pol</sup> and VP1 regions of LV. Primer position refers to the LV strain 87-012 genome sequence (GenBank acc. no.: AF327920).

| Designation    | Region            |           | Position  | Sequence (5'→3')                   |
|----------------|-------------------|-----------|-----------|------------------------------------|
|                | amplified         | Direction |           |                                    |
| PeV 3D F1*     | 3D <sup>pol</sup> | forward   | 6602-6623 | GNA ARA CYM GDT GYA THG ARG C      |
| PeV 3D F2*     | 3D <sup>pol</sup> | forward   | 6679-6695 | THT ATG ANR MAA TYT AYC ARA CYC C  |
| Lv 3D F1*      | 3D <sup>pol</sup> | forward   | 6645-6668 | GCC TAY AGA GTT GTD ATG TCN TC     |
| Lv 3D F3^      | 3D <sup>pol</sup> | forward   | 6772-6794 | TAT AAY TAT GGY YTR GA TTA YTC     |
| Lv 3D F4^      | 3D <sup>pol</sup> | forward   | 7009-7028 | TGT ACA TAT TTG GCC TAT GA         |
| PeV 3D R1a*    | 3D <sup>pol</sup> | reverse   | 7278-7303 | TYT TCA TCC ACA TWA HRT GYT GTT CC |
| PeV 3D R1b*    | 3D <sup>pol</sup> | reverse   | 7278-7303 | TYT TCA TCC ACA TWA HRT GYT GTA TC |
| Pev 3D R2*     | 3D <sup>pol</sup> | reverse   | 6967-6989 | GAA TTY ARM ACA GTD GTR CAI GG     |
| Lv 3D R1*      | 3D <sup>pol</sup> | reverse   | 7278-7303 | TYT TCA TCC ACA TAA TRT GYT GTT CC |
| Lv 3D R2*      | 3D <sup>pol</sup> | reverse   | 7142-7163 | TCT GAK GMN GTC ACT TCC ATN CC     |
| Lv 3D R3^      | 3D <sup>pol</sup> | reverse   | 6841-6863 | TCA TGA CAR TAR GCA AGD ATT TC     |
| Lv 3D R4^      | 3D <sup>pol</sup> | reverse   | 7057-7079 | ATY ACA TCA TYC CAT AAA CAA T      |
| Lv VP1 F1^     | VP1               | forward   | 2284-2304 | GAG ATW CAR GAY ADK GAR GAA        |
| Lv VP1 F2*     | VP1               | forward   | 2659-2681 | AAA GTT GCW CAY ACM TGG TTT GG     |
| Lv VP1 F3^     | VP1               | forward   | 2773-2793 | TAY TAY TCW GAR GYN CCA YT         |
| Lv VP1 F4 I^   | VP1               | forward   | 2839-2863 | TYT TYT AYC AGT GTG TTG GGC GCT    |
| Lv VP1 F4 II^  | VP1               | forward   | 2839-2863 | CTY TTY ACA CAR GCK GTR GGM AGR    |
| Lv VP1 F4 III^ | VP1               | forward   | 2839-2863 | TYT TYA CMC ART GYA TTG GMA AYA    |
| Lv VP1 F5 I^   | VP1               | forward   | 2893-2913 | AGY YTA CGC TGY CCY AAT TT         |
| Lv VP1 F5 II^  | VP1               | forward   | 2893-2913 | AGY TTY CGC TGT CCT AAT TT         |
| Lv VP1 F5 III^ | VP1               | forward   | 2893-2913 | AGY TTT CGC TGY CCM AAY TT         |
| Lv VP1 R1*     | VP1               | reverse   | 3188-3208 | TCR ATR TCR GGG CCW GGG TT         |
| Lv VP1 R2a*    | VP1               | reverse   | 3341-3364 | GCA TGT GTC CAA TTT CCA TCA TC     |
| Lv VP1 R2b*    | VP1               | reverse   | 3341-3364 | GCA TGA ACC CAT TTG CCA TCA TC     |
| Lv VP1 R3^     | VP1               | reverse   | 3385-3404 | TGT TTN GAR CCA ACC ATT GA         |
| Lv VP1 R4 I^   | VP1               | reverse   | 3077-3102 | TCY CTC AAT TGT GCC AAT GGR TCA T  |
| Lv VP1 R4 II^  | VP1               | reverse   | 3341-3364 | TCY CKM ART TGT TTC ARR GGR TCT T  |
| Lv VP1 R4 III^ | VP1               | reverse   | 3341-3364 | TCY CTM AGY TGT CTY ARR GGA TCH T  |
| Lv VP1 R5 I^   | VP1               | reverse   | 3131-3156 | CCA GAG TAT TCC ATT TCA TCA CTG T  |
| Lv VP1 R5 II^  | VP1               | reverse   | 3131-3156 | CCR GCA WAR TCC ATY TCA TCA CTR T  |
| Lv VP1 R5 III^ | VP1               | reverse   | 3131-3156 | CCR GAR TAR TCC ATY TCA TCA YTR T  |

\* primers designed based on the deposited genomes of LV and HPeV.

^ additional primers designed based on the deposited genomes of LV and HPeV in combination with sequences obtained from this paper.

**Supplementary Table S3.** Samples used in the network analysis based on 5'-UTR sequences, including country and site of origin, host species and family/subfamily (subf.).

| Country | Site* | Species (n°individuals)         | Common name              | Family                         |
|---------|-------|---------------------------------|--------------------------|--------------------------------|
| Finland | PJ    | <i>Myodes glareolus</i> (4)     | bank vole                | Cricetidae - subf: Arvicolinae |
| Finland | PJ    | <i>Microtus agrestis</i> (4)    | field vole               | Cricetidae - subf: Arvicolinae |
| Finland | PJ    | <i>Lemmus lemmus</i> (2)        | Norway lemming           | Cricetidae - subf: Arvicolinae |
| Finland | PJ    | <i>Myodes rutilus</i> (2)       | northern red-backed vole | Cricetidae - subf: Arvicolinae |
| Finland | PJ    | <i>Myopus schisticolor</i> (3)  | wood lemming             | Cricetidae - subf: Arvicolinae |
| Finland | KJ    | <i>Lemmus lemmus</i> (3)        | Norway lemming           | Cricetidae - subf: Arvicolinae |
| Italy   | SO    | <i>Myodes glareolus</i> (23)    | bank vole                | Cricetidae - subf: Arvicolinae |
| Italy   | SO    | <i>Sorex antinorii</i> (1)      | Valais shrew             | Soricidae                      |
| Italy   | TN    | <i>Myodes glareolus</i> (4)     | bank vole                | Cricetidae - subf: Arvicolinae |
| Italy   | TN    | <i>Apodemus flavicollis</i> (4) | yellow-necked mouse      | Muridae                        |
| Italy   | BS    | <i>Myodes glareolus</i> (2)     | bank vole                | Cricetidae - subf: Arvicolinae |
| Italy   | BS    | <i>Sorex antinorii</i> (1)      | Valais shrew             | Soricidae                      |
| Italy   | BS    | <i>Mus musculus</i> (3)         | house mouse              | Muridae                        |
| Italy   | LC    | <i>Sciurus vulgaris</i> (1)     | Eurasian red squirrel    | Sciuridae                      |
| Italy   | PV    | <i>Sciurus vulgaris</i> (1)     | Eurasian red squirrel    | Sciuridae                      |

\*For description and coordinates of sampling sites, see Table 1.
